# Supplementary material for: Enhanced Neurocognitive Functioning and Positive Temperament in Twins Discordant for Bipolar Disorder
Source: Atypon-hosted journal article supplement (doi:10.1176/appi.ajp.2014.13121683), 2014-08-15
Supplement: appi.ajp.2014.13121683.ds001.pdf [file appi.ajp.2014.13121683.ds001.pdf]

FIGURE S1. Flow Diagram of Recruitment Procedure

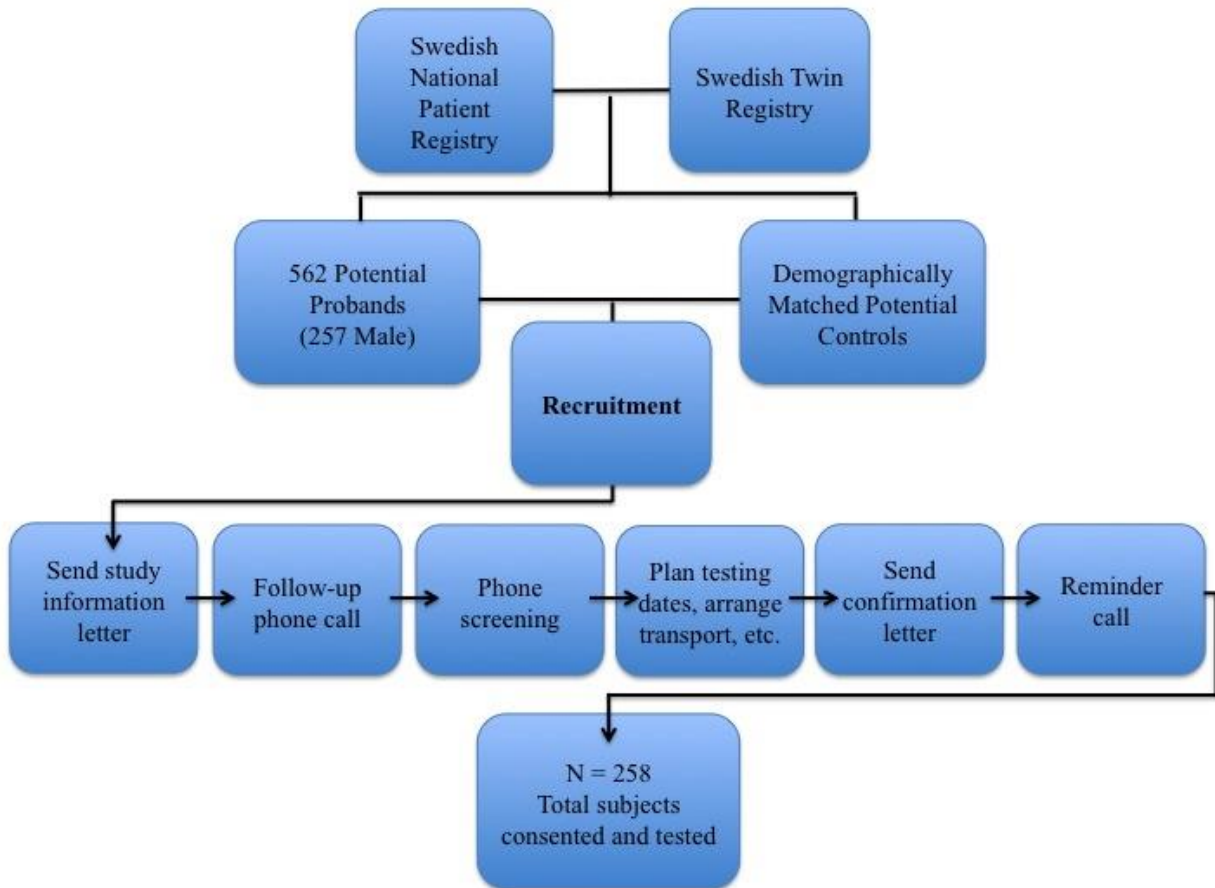

**TABLE S1. Temperament Scale Derivation: Original Scale Items**

| POSITIVITY SCALE - SOCIALLY OUTGOING, CONFIDENT, ASSERTIVE    |                                                                                                       |
|---------------------------------------------------------------|-------------------------------------------------------------------------------------------------------|
| Scale / Item No.                                              | Item                                                                                                  |
| BIS 03                                                        | I make up my mind quickly                                                                             |
| BIS 08                                                        | I am self-controlled                                                                                  |
| BIS 12                                                        | I am a careful thinker                                                                                |
| BIS 30                                                        | I am future oriented                                                                                  |
| TEMPSA 29                                                     | I have a gift for speech, convincing and inspiring to others.                                         |
| TEMPSA 30                                                     | I often get many great ideas.                                                                         |
| TEMPSA 31                                                     | I love to tackle new projects, even if risky.                                                         |
| TEMPSA 32                                                     | I like telling jokes, and people tell me I'm humorous.                                                |
| TEMPSA 33                                                     | I have abilities and expertise in many fields.                                                        |
| TEMPSA 34                                                     | I am totally comfortable even with people I hardly know.                                              |
| TEMPSA 35                                                     | I love to be with a lot of people.                                                                    |
| TEMPSA 36                                                     | I am the kind of person who likes to be the boss.                                                     |
| ZSS 01                                                        | I would like a job that would require a lot of traveling                                              |
| ZSS 05                                                        | I like some of the earthy body smells                                                                 |
| ZSS 12                                                        | I like to try new foods that I have never tasted before.                                              |
| ZSS 15                                                        | I would like to take up the sport of water skiing.                                                    |
| ZSS 16                                                        | I find people who disagree with my beliefs more stimulating than people who agree with me.            |
| ZSS 17                                                        | I would like to take off on a trip with no preplanned or definite routes, or timetables.              |
| ZSS 22                                                        | The most important goal of life is to live it to the fullest and experience as much of it as you can. |
| ZSS 24                                                        | I like to dive or jump right into the ocean or a cold pool                                            |
| ZSS 26                                                        | I prefer friends who are excitingly unpredictable                                                     |
| ZSS 27                                                        | When I go on a vacation I would prefer the change of camping out                                      |
| ZSS 28                                                        | I often find beauty in the "clashing" colors and irregular forms of modern paintings                  |
| ZSS 31                                                        | I prefer people who are emotionally expressive even if they are a bit unstable                        |
| NEGATIVITY SCALE - DEPRESSIVE, ANXIOUS, SUSPICIOUS, WITHDRAWN |                                                                                                       |
| Scale / Item No.                                              | Item                                                                                                  |
| SPQ 01                                                        | People sometimes find me aloof and distant.                                                           |
| SPQ 05                                                        | Have you ever noticed a common event or object that seemed to be a special sign for you?              |
| SPQ 07                                                        | I feel I have to be on my guard even with friends.                                                    |
| SPQ 08                                                        | Some people find me a bit vague and elusive during a conversation                                     |
| SPQ 09                                                        | Do you often pick up hidden threats or put-downs from what people say or do?                          |
| SPQ 11                                                        | I feel very uncomfortable in social situations involving unfamiliar people.                           |
| SPQ 13                                                        | I sometimes use words in unusual ways.                                                                |
| SPQ 14                                                        | Have you found that it is best not to let other people know too much about you?                       |
| SPQ 15                                                        | I tend to keep in the background on social occasions.                                                 |
| SPQ 17                                                        | Do you often have to keep an eye out to stop people from taking advantage of you?                     |
| SPQ 18                                                        | Do you feel that you are unable to get "close" to people?                                             |
| SPQ 19                                                        | I am an odd, unusual person.                                                                          |

|           |                                                                                |
|-----------|--------------------------------------------------------------------------------|
| SPQ 20    | I find it hard to communicate clearly what I want to say to people.            |
| SPQ 21    | I feel very uneasy talking to people I do not know well.                       |
| SPQ 22    | I tend to keep my feelings to myself                                           |
| TEMPSA 13 | People tell me I am unable to see the lighter side of things.                  |
| TEMPSA 14 | I'm the kind of person who doubts everything.                                  |
| TEMPSA 15 | I am a very skeptical person.                                                  |
| TEMPSA 16 | I am by nature a dissatisfied person.                                          |
| TEMPSA 17 | I'm a sad, unhappy person.                                                     |
| TEMPSA 18 | I think things often turn out for the worst.                                   |
| TEMPSA 19 | I give up easily.                                                              |
| TEMPSA 20 | I complain a lot.                                                              |
| TEMPSA 37 | I am often fearful of someone in my family coming down with a serious disease. |
| TEMPSA 38 | I'm always thinking someone might break bad news to me about a family member.  |
| TEMPSA 39 | When someone is late coming home, I fear they may have had an accident.        |
| BIS 18    | I get easily bored when solving thought problems                               |
| BIS 23    | I can only think about one problem at a time.                                  |

---

Abbreviations: BIS=Barratt Impulsivity Scale-Version 11; TEMPSA=Temperament Evaluation of Memphis, Pisa, Paris and San Diego-autoquestionnaire, short form; SPQ=Schizotypal Personality Questionnaire; ZSS=Zuckerman Sensation-Seeking Scale, Form II.
